# Supplementary material for: Svx Peptidases of Phytopathogenic Pectolytic Bacteria: Structural, Catalytic and Phytoimmune Properties
Source: MDPI journal article supplement (doi:10.3390/ijms25020756), 2024-01-07
Supplement: s1 [file s1]

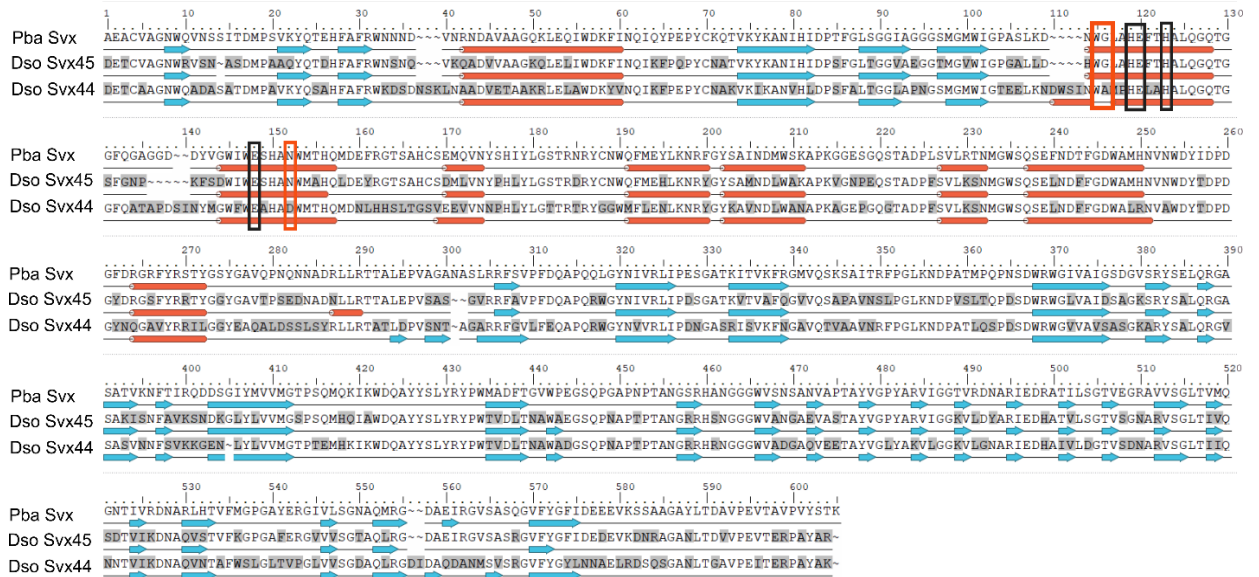

Figure S1. The alignment of amino acid sequences without signal peptides of the *Pectobacterium atrosepticum* (*Pba SvX*) protein (*Pba SvX*) and *Dickeya solani* (*Dso SvX44* and *Dso SvX45*). The secondary structures predicted by AlphaFold 2 are indicated by orange horizontal cylinders (alpha helices) and blue arrows (beta-strands). Zinc-binding metalloproteinase active sites and predicted carbohydrate-binding residues are indicated by black and bright-orange frames, respectively. Amino acid residues of the *Dso SvX44* and *Dso SvX45* that do not correspond to the amino acid residues of the *Pba SvX* are colored grey.

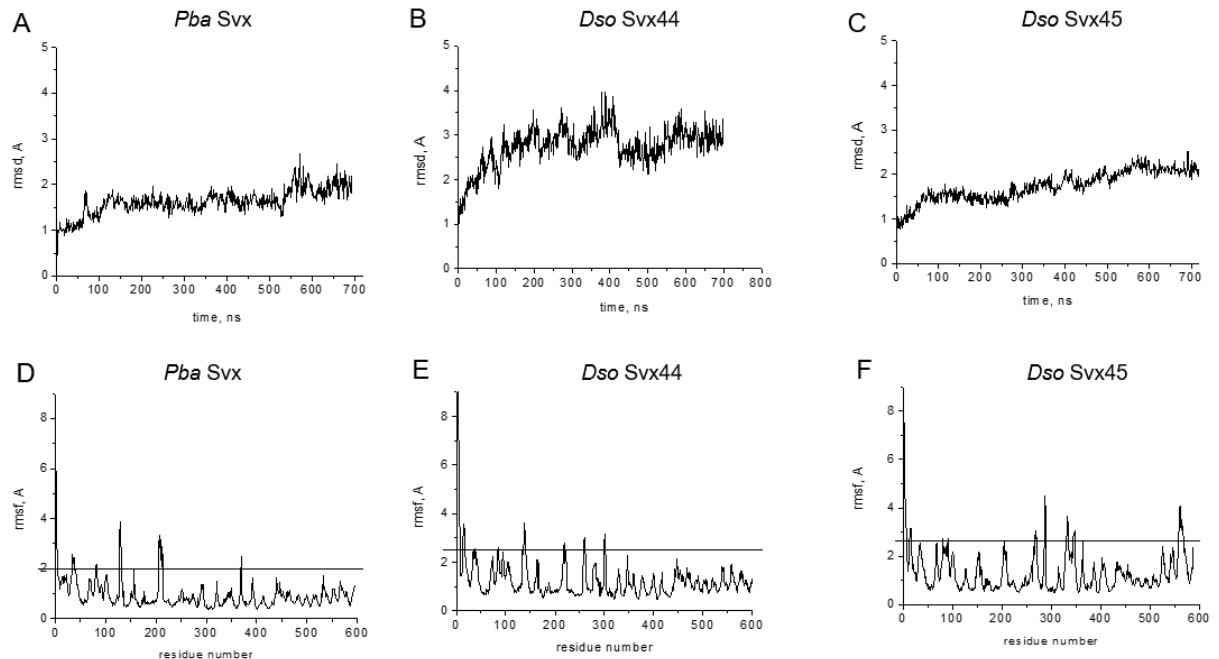

Figure S2. Root-mean square deviation (A, B, C) and root-mean square fluctuation (D, E, F) evolution over time in the course of molecular dynamics trajectories for AlphaFold 2 models of the SvX proteins of *Pectobacterium atrosepticum* (*Pba SvX*) and *Dickeya solani* (*Dso SvX44* and *Dso SvX45*). The horizontal lines indicate a double value of the trajectory averaged RMSF value.

### A *Pba* Sv<sub>x</sub>

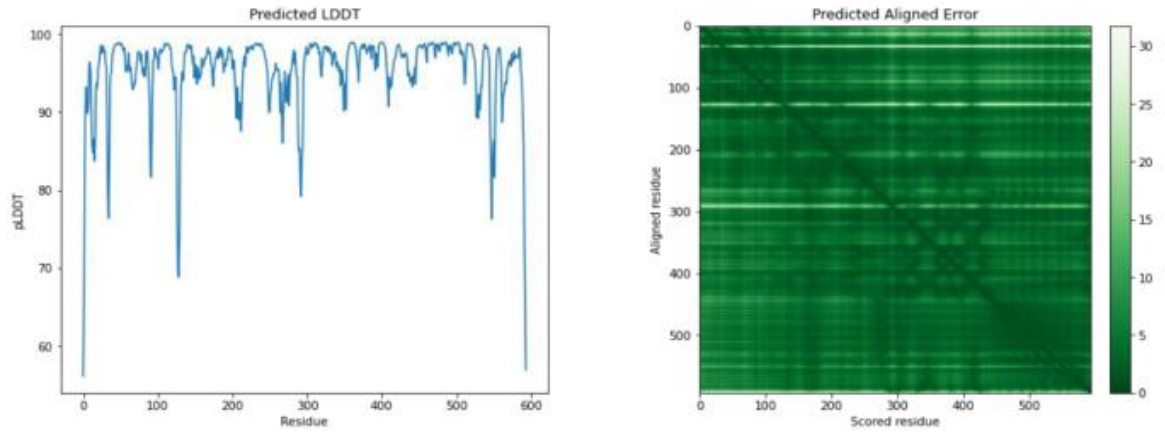

### B *Dso* Sv<sub>x44</sub>

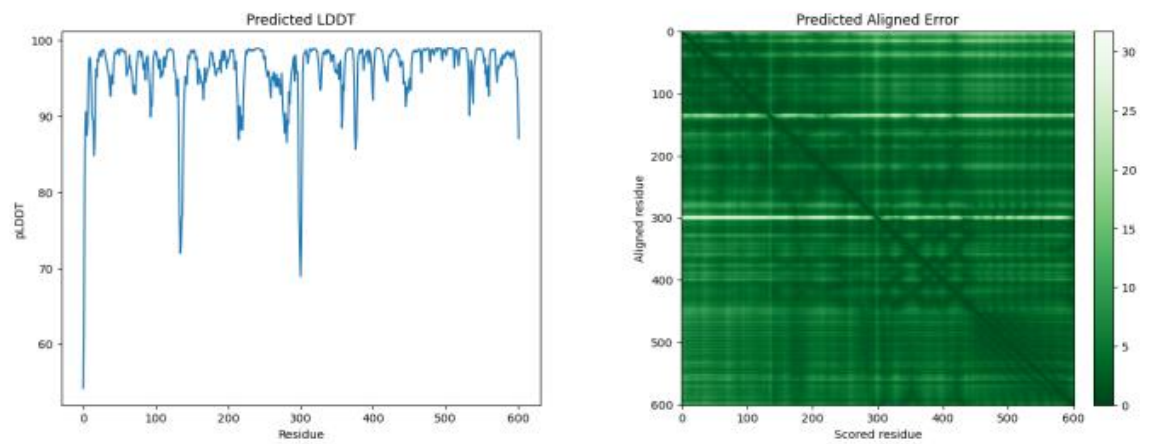

### C *Dso* Sv<sub>x45</sub>

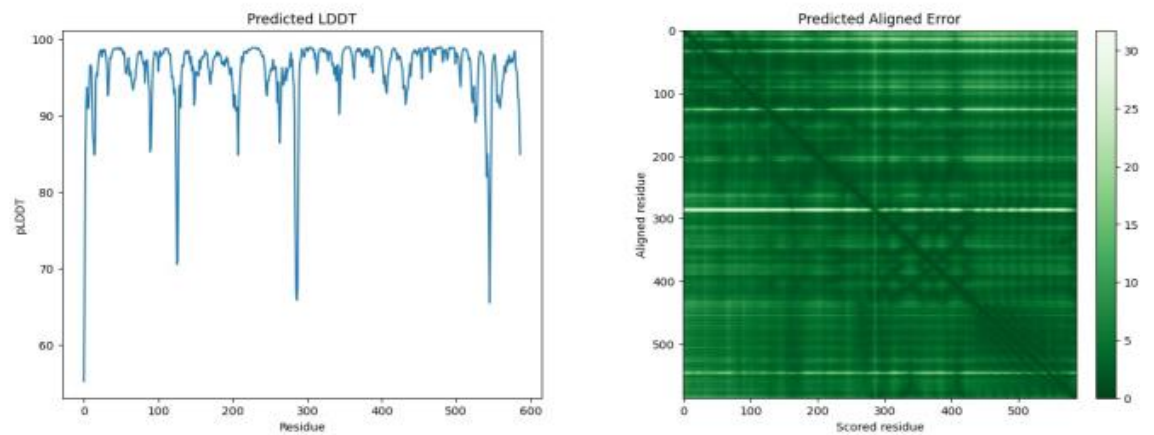

Figure S3. The results of the predicted local-distance difference test for each residue position of the models (built by AlphaFold 2) of the Sv<sub>x</sub> proteins of *Pectobacterium atrosepticum* (*Pba* Sv<sub>x</sub>) and *Dickeya solani* (*Dso* Sv<sub>x44</sub> and *Dso* Sv<sub>x45</sub>). Data for *Pba* Sv<sub>x</sub> were previously published in supplementary materials [Tendiuk *et al.*, 2022]. The model confidence is high, with LDDT above 70% for the majority of the residues. The regions of low confidence (slightly below 70%) are located on the loops.

Table S1. Residues forming contacts between the metallopeptidase and acyltransferase-like domains of the Svx proteins of *Pectobacterium atrosepticum* (*Pba* Svx) and *Dickeya solani* (*Dso* Svx44 and *Dso* Svx45). Shortest distances from a residue to the neighboring domain over time of trajectories are given with cut-off 0.3 nm.

|                              | Residue | Distance (nm) | ± Standard Deviation (nm) |
|------------------------------|---------|---------------|---------------------------|
| <i>Pba</i> Svx               |         |               |                           |
| Metallopeptidase domain      | ARG203  | 0.180         | 0.010                     |
|                              | ASP331  | 0.191         | 0.015                     |
|                              | HIS196  | 0.192         | 0.013                     |
|                              | LYS374  | 0.202         | 0.058                     |
|                              | GLN301  | 0.225         | 0.039                     |
|                              | PRO299  | 0.228         | 0.015                     |
|                              | LEU308  | 0.229         | 0.015                     |
|                              | GLN332  | 0.232         | 0.017                     |
|                              | TYR445  | 0.232         | 0.016                     |
|                              | LEU307  | 0.236         | 0.018                     |
|                              | GLN298  | 0.241         | 0.074                     |
|                              | ALA304  | 0.241         | 0.022                     |
|                              | TYR194  | 0.243         | 0.018                     |
|                              | ILE197  | 0.243         | 0.019                     |
|                              | GLN466  | 0.250         | 0.030                     |
|                              | PRO329  | 0.265         | 0.029                     |
|                              | PRO315  | 0.268         | 0.032                     |
|                              | ALA312  | 0.273         | 0.052                     |
|                              | TYR446  | 0.273         | 0.018                     |
|                              | ASN300  | 0.284         | 0.044                     |
|                              | PRO467  | 0.296         | 0.030                     |
| acyltransferase-like domains | SER533  | 0.224         | 0.014                     |
|                              | VAL553  | 0.234         | 0.030                     |
|                              | LEU535  | 0.235         | 0.019                     |
|                              | THR552  | 0.235         | 0.015                     |
|                              | PRO557  | 0.237         | 0.023                     |
|                              | TYR589  | 0.249         | 0.019                     |
|                              | VAL537  | 0.249         | 0.092                     |
|                              | GLY499  | 0.278         | 0.062                     |
|                              | PHE591  | 0.283         | 0.081                     |
|                              | ASP575  | 0.284         | 0.101                     |
|                              | THR520  | 0.288         | 0.102                     |
|                              | ARG503  | 0.289         | 0.113                     |
|                              | PHE554  | 0.297         | 0.060                     |
| <i>Dso</i> Svx44             |         |               |                           |
| Metallopeptidase domain      | LYS382  | 0.193         | 0.040                     |
|                              | ARG212  | 0.196         | 0.025                     |
|                              | HIS205  | 0.204         | 0.026                     |
|                              | SER313  | 0.218         | 0.041                     |
|                              | GLU339  | 0.221         | 0.031                     |
|                              | LEU337  | 0.234         | 0.018                     |
|                              | LEU317  | 0.236         | 0.018                     |
|                              | TYR314  | 0.237         | 0.023                     |

|                             |        |       |       |
|-----------------------------|--------|-------|-------|
|                             | LEU316 | 0.239 | 0.029 |
|                             | TYR452 | 0.241 | 0.017 |
|                             | ASN203 | 0.243 | 0.020 |
|                             | THR321 | 0.249 | 0.027 |
|                             | GLU199 | 0.251 | 0.042 |
|                             | LEU206 | 0.253 | 0.032 |
|                             | ASP323 | 0.258 | 0.095 |
|                             | LEU308 | 0.267 | 0.107 |
|                             | TYR453 | 0.269 | 0.019 |
|                             | PRO324 | 0.280 | 0.054 |
|                             | SER310 | 0.299 | 0.120 |
| acyltransferase-like domain | ALA560 | 0.202 | 0.02  |
|                             | ASP582 | 0.204 | 0.031 |
|                             | HIS525 | 0.221 | 0.037 |
|                             | LEU542 | 0.224 | 0.014 |
|                             | TRP562 | 0.234 | 0.030 |
|                             | ILE544 | 0.235 | 0.019 |
|                             | PHE561 | 0.235 | 0.015 |
|                             | LEU566 | 0.237 | 0.023 |
|                             | GLN546 | 0.249 | 0.092 |
|                             | GLY541 | 0.268 | 0.063 |
|                             | GLY581 | 0.269 | 0.025 |
|                             | TYR508 | 0.278 | 0.062 |
|                             | TYR600 | 0.283 | 0.081 |
|                             | ASP584 | 0.284 | 0.101 |
|                             | LEU529 | 0.287 | 0.102 |
|                             | LEU512 | 0.289 | 0.113 |
|                             | SER563 | 0.297 | 0.059 |
| <i>Dso</i> SvX45            |        |       |       |
| Metallopeptidase domain     | ARG199 | 0.213 | 0.055 |
|                             | HIS192 | 0.224 | 0.027 |
|                             | LEU304 | 0.226 | 0.015 |
|                             | ALA300 | 0.227 | 0.016 |
|                             | ASP325 | 0.230 | 0.023 |
|                             | LEU193 | 0.233 | 0.018 |
|                             | TYR190 | 0.242 | 0.018 |
|                             | LEU303 | 0.243 | 0.029 |
|                             | GLU310 | 0.244 | 0.086 |
|                             | PRO323 | 0.245 | 0.030 |
|                             | GLN326 | 0.247 | 0.030 |
|                             | ASP301 | 0.248 | 0.059 |
|                             | PRO295 | 0.252 | 0.044 |
|                             | TYR439 | 0.259 | 0.028 |
|                             | MET186 | 0.273 | 0.073 |
|                             | PRO311 | 0.274 | 0.046 |
|                             | GLU297 | 0.284 | 0.098 |
|                             | TYR440 | 0.285 | 0.045 |
|                             | ALA308 | 0.288 | 0.068 |
|                             | LYS368 | 0.295 | 0.161 |
| acyltransferase-like        | VAL547 | 0.216 | 0.018 |

|        |        |       |       |
|--------|--------|-------|-------|
| domain | HIS512 | 0.217 | 0.028 |
|        | LEU529 | 0.222 | 0.015 |
|        | ASP569 | 0.223 | 0.068 |
|        | TYR495 | 0.223 | 0.052 |
|        | TYR583 | 0.229 | 0.035 |
|        | ILE531 | 0.233 | 0.017 |
|        | LYS549 | 0.235 | 0.057 |
|        | PHE548 | 0.236 | 0.023 |
|        | LE516  | 0.238 | 0.021 |
|        | ILE499 | 0.247 | 0.028 |
|        | THR514 | 0.251 | 0.035 |
|        | ARG497 | 0.251 | 0.034 |
|        | THR467 | 0.256 | 0.046 |
|        | PRO466 | 0.259 | 0.067 |
|        | GLY528 | 0.279 | 0.033 |

Table S2. Primers used in the present study.

| Name       | Primer sequence                                             | Gene ID       |
|------------|-------------------------------------------------------------|---------------|
| Svx44_F    | CGCCCCGTTATTTCACTTCTGGTA                                    |               |
| Svx44_R    | CGCCGTCAGCCATGATATGC                                        |               |
| Svx45_F    | GCATATCATGGCTGACGGCG                                        |               |
| Svx45_R    | AGGCGTGTTTTCTTTTCATTGG                                      |               |
| Svx44His_F | ATCGTCGAGCTCTTAGTGATGGTGATGGTGATGTTTCGCGTAA<br>GCCGGACGTTTC | A4U42_RS02180 |
| Svx44His_R | ATCGTCCCATGGCGGATGAAACCTGCGCG                               |               |
| Svx45His_F | ATCGTCGAGCTCTTAGTGATGGTGATGGTGATGTCTGGCGTAG<br>GCCGGACGTT   | A4U42_RS02185 |
| Svx45His_R | ATCGTCCCATGGCGGATGAAACCTGTGTGGCG                            |               |
| NtEF_F     | GCCCAACACTTCTTGATGCTC                                       | LOC107791623  |
| NtEF_R     | GACACCAGTTTCCACACGACC                                       |               |
| NtATP_F    | GGTCGATGGCTTGGGAGTACC                                       | LOC107762397  |
| NtATP_R    | GCACAGATTTACGTTCAATAATACCAG                                 |               |
| NtERF1a_F  | GATAGGGCAGCTTATTCAATGAGAGGTC                                | LOC107766165  |
| NtERF1a_R  | CCAAACATTCAAATTCAAGAACTTCCC                                 |               |
| NtACO1_F   | CTTGAAGCTGTGCAAGCTGAGGTTAC                                  | LOC107781126  |
| NtACO1_R   | CCAAGATTTTCACATAGCAAGTCCAG                                  |               |
| NtLOX_F    | CACGCATAATGAGTTTGATAGTTTTG                                  | LOC107806322  |

|         |                            |              |
|---------|----------------------------|--------------|
| NtLOX_R | CTGAGGAGTTGGGTACTTAAATAGGC |              |
| NtAOC_F | CGGCTCAACTGATTCTCTACAAC    | LOC107768393 |
| NtAOC_R | GTTTGTTGCTAAAGGGGACAAGATC  |              |
| NtPR1_F | GAGGCGAAAGTCCATACTAATTG    | LOC107807832 |
| NtPR1_R | CCACTTGGTCTTTTTATAGATCCAC  |              |
